# Supplementary material for: 3T DCE-MRI Radiomics Improves Predictive Models of Complete Response to Neoadjuvant Chemotherapy in Breast Cancer
Source: PubMed Central journal article supplement (PMC8093630; doi:10.3389/fonc.2021.630780), 2021-04-20
Supplement: DataSheet_1.pdf [file DataSheet_1.pdf]

## *Supplementary Material*

### 1 Significance tests

| $p^{\text{best6}}$ | Logit    | SVR      | RF       |  | $p^{\text{best6}} / p^{\text{best6}}_{\text{All}}$ | Logit | SVR    | RF   |
|--------------------|----------|----------|----------|--|----------------------------------------------------|-------|--------|------|
| <b>G1</b>          | 1,33 E-1 | 4,65 E-1 | 9,64 E-2 |  | <b>G1</b>                                          | 29983 | 165069 | 1651 |
| <b>Rad</b>         | 1,01 E-3 | 6,32 E-4 | 1,81 E-2 |  | <b>Rad</b>                                         | 228   | 224    | 310  |
| <b>Hist</b>        | 1,74 E-4 | 2,59 E-5 | 5,18 E-4 |  | <b>Hist</b>                                        | 39    | 9      | 9    |
| <b>NoRad</b>       | 3,86 E-4 | 4,99 E-5 | 5,29 E-4 |  | <b>NoRad</b>                                       | 87    | 18     | 9    |
| <b>All</b>         | 4,44 E-6 | 2,82 E-6 | 5,84 E-5 |  | <b>All</b>                                         | 1     | 1      | 1    |

**Supplementary Table 1.** Average significance (p-values) of the best 6 models for each classifier type (Logistic regression, Support Vector Machines, Random Forest) and each group of covariates. P-values have been corrected for test multiplicity to limit the false discovery rate (Benjamini-Hochberg method, see main text) with the total number of elements of the covariates group. To ease the comparison the same values have been normalized to the *All* group, on the right side of the table ( $p^{\text{best6}} / p^{\text{best6}}_{\text{All}}$ ).

## 2 AUC vs number of variables

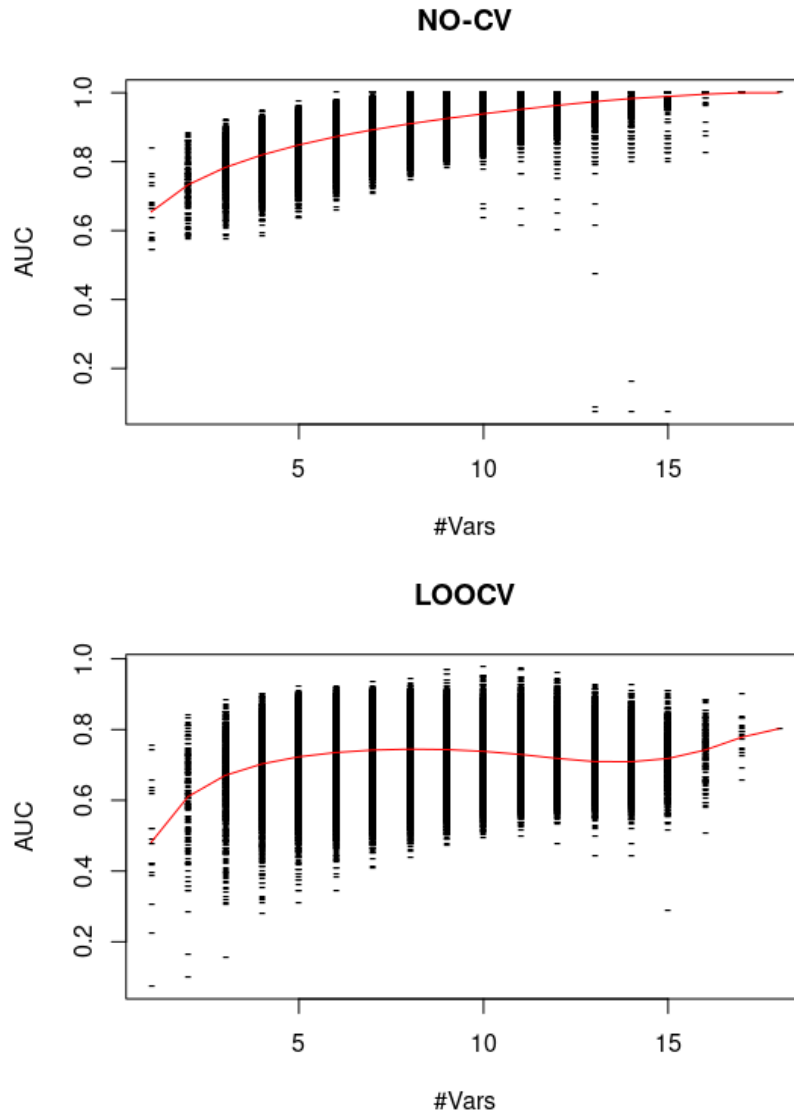

**Supplementary Figure 1.** AUC as a function of the number of used variables in all the studied models (about 280'000) for the non cross-validated (NO-CV, left) and the cross validated models (LOOCV, right). The red line is the average of all the AUC as a function of the number of used variables. Only one model contains all the variables ( $\#Var = 18$ ), visible as the rightmost dot in the graphs. Differently from the non cross-validated models, which tend to overfit when the number of variables is high, the CV ones have constant average AUCs up to 18 variables. Overfit in CV models provide a low AUC. Please note that the red line is not representative for the average performances of a well-defined model but the average among all the possible models built with this set of variables (and therefore also models omitting important information).

### 3 Probabilistic misclassification of the best 6 models.

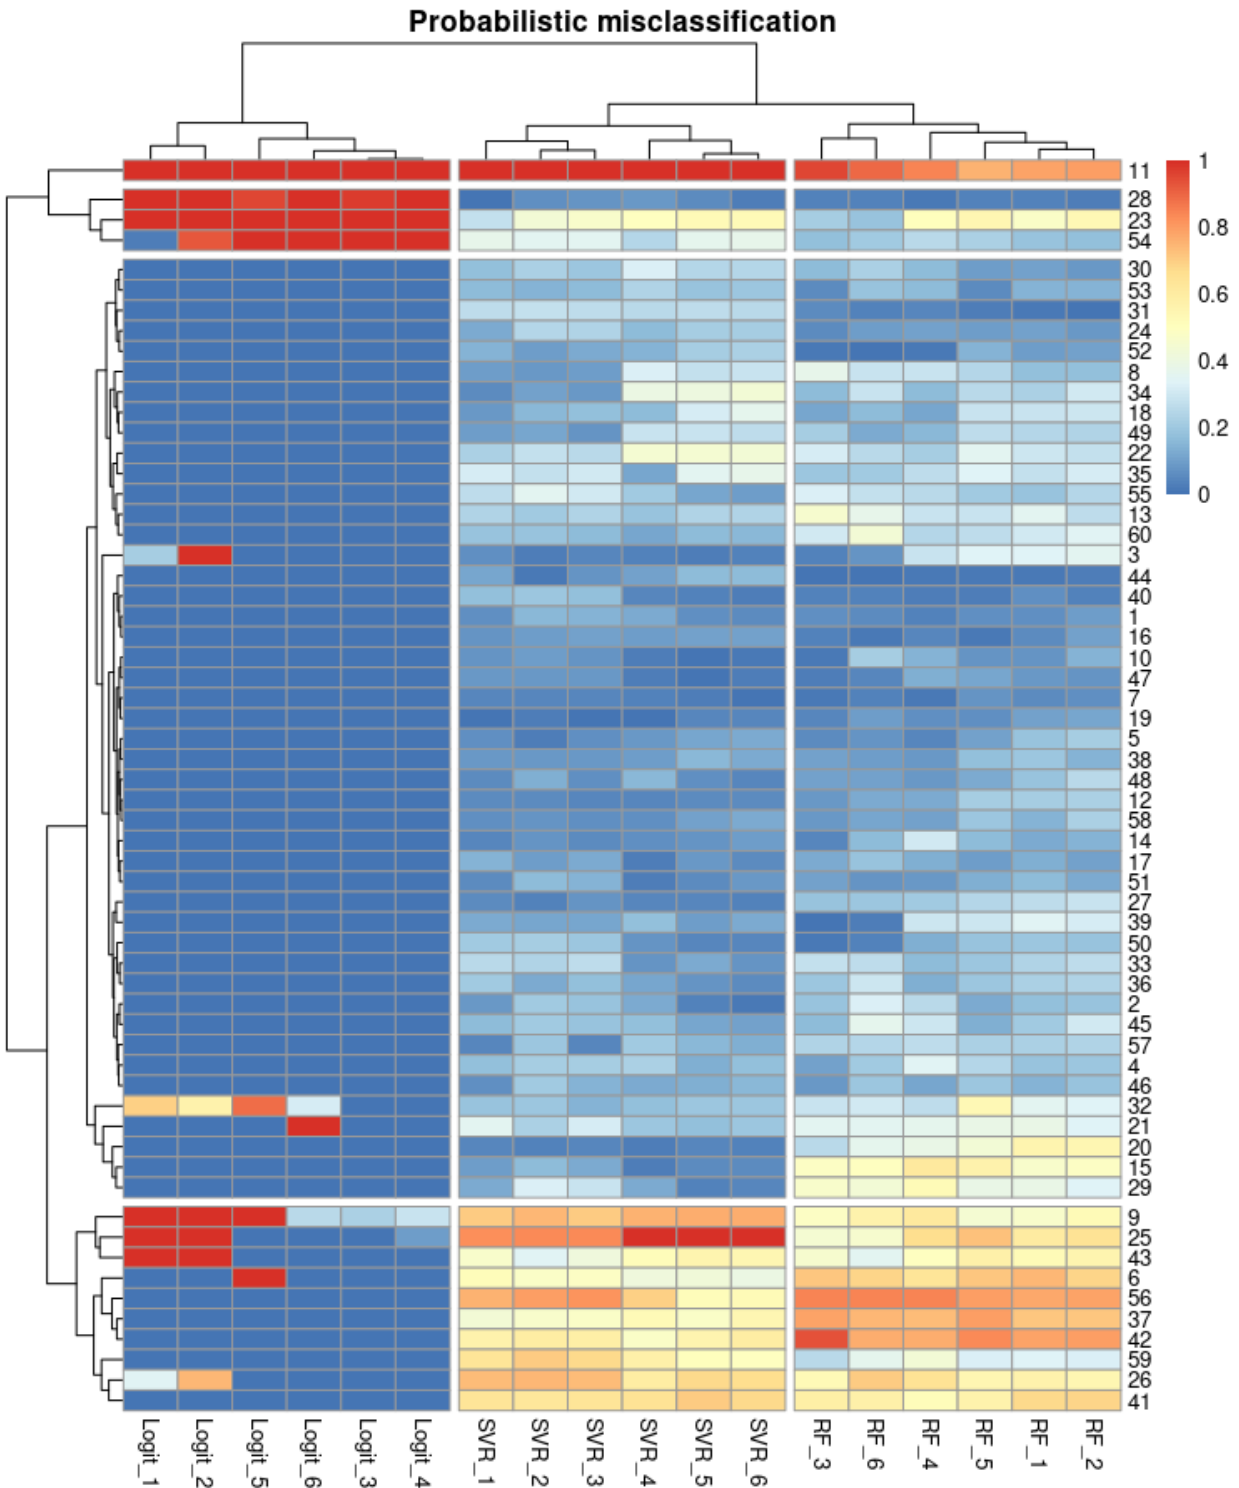

**Supplementary Figure 2.** Probabilistic Misclassification (colorbar) for each patient (rows) and model (columns). Probabilistic Misclassification (PM) is defined as  $|t_i - p_i|$  where  $p_i$  is the predicted probability from the model for the case  $i$  and  $t_i$  is the true value for the same case (either 0 or 1).
